# Supplementary material
Source: PubMed Central journal article supplement (PMC3102365)
Supplement: 1101555108_Appendix.pdf [file 1101555108_Appendix.pdf]

**Rapid Search for Specific Sites on DNA Through Conformational Switch of  
Nonspecifically Bound Proteins**

Huan-Xiang Zhou\*

Department of Physics and Institute of Molecular Biophysics, Tallahassee, Florida 32306,  
USA

*Supplementary Information Appendix*

**Search Time  $t_s$  and Bimolecular Rate Constant  $k_a$  for the Two-State Model.** In this model, illustrated by the unimolecular scheme of the main text, the DNA-binding protein is assumed to transfer stochastically between the bulk solution and the DNA surface; in the latter region the protein has a finite chance of being captured by the specific site. These steps are modeled as ordinary chemical kinetics, with rate constants  $\kappa_3$ ,  $\kappa_{3-}$ , and  $\kappa_1$ .

Correspondingly the average lifetime of  $P_b$ , the protein in the bulk solution, is

$$\bar{t}_{3d} = \frac{1}{\kappa_3}, \quad [\text{S1}]$$

and the average lifetime of  $P_{ns}$ , the nonspecifically bound protein, is

$$\bar{t}_{1d} = \frac{1}{\kappa_{3-} + \kappa_1}. \quad [\text{S2}]$$

Note that  $P_{ns}$  can decay via two pathways: to  $P_b$  with rate constant  $\kappa_{3-}$ , and to  $P_s$  (the target-bound protein) with rate constant  $\kappa_1$ . That is why the denominator on the right-hand side of Eq. S2 is the sum of the two rate constants. Between the two pathways, the probability for the latter is

$$\eta = \frac{\kappa_1}{\kappa_{3-} + \kappa_1}. \quad [\text{S3}]$$

Starting from the bulk solution, the probability of the protein reaching  $P_s$  after  $n$  rounds of cycling between  $P_b$  and  $P_{ns}$  is (1)

$$p_n = (1 - \eta)^{n-1} \eta. \quad [\text{S4}]$$

The average rounds of cycling between  $P_b$  and  $P_{ns}$  that the protein goes through before being captured by the specific site is therefore

$$\bar{n} = \sum_{n=1}^{\infty} n P_n = \frac{1}{\eta} \quad [\text{S5a}]$$

$$= \frac{\kappa_{3-} + \kappa_1}{\kappa_1}. \quad [\text{S5b}]$$

The average total search time is

$$t_s = \bar{n}(\bar{t}_{3d} + \bar{t}_{1d}) \quad [\text{S6a}]$$

$$= \frac{\kappa_{3-} + \kappa_1}{\kappa_1} \left( \frac{1}{\kappa_3} + \frac{1}{\kappa_{3-} + \kappa_1} \right) \quad [\text{S6b}]$$

$$= \frac{1}{\kappa_3} + \left( 1 + \frac{\kappa_{3-}}{\kappa_3} \right) \frac{1}{\kappa_1}. \quad [\text{S6c}]$$

Eq. S6c can also be derived from solving the rate equations corresponding to unimolecular reaction scheme. Denoting the probability of the protein being in the  $P_b$  state at time  $t$  as  $[P_b](t)$  and the analogous quantity for the  $P_{ns}$  state as  $[P_{ns}](t)$ , we have

$$\frac{d[P_b](t)}{dt} = -\kappa_3[P_b](t) + \kappa_{3-}[P_{ns}](t), \quad [\text{S7a}]$$

$$\frac{d[P_{ns}](t)}{dt} = \kappa_3[P_b](t) - (\kappa_{3-} + \kappa_1)[P_{ns}](t). \quad [\text{S7b}]$$

The sum of the probabilities that the protein is still in  $P_b$  and  $P_{ns}$  at time  $t$  is the survival probability, i.e., the probability that the protein has not been captured:

$$S(t) = [P_b](t) + [P_{ns}](t). \quad [\text{S8}]$$

The search time  $t_s$  is the average time that the protein takes to reach  $P_s$  for the first time, and is given by

$$t_s = \int_0^{\infty} dt S(t). \quad [\text{S9}]$$

Solving Eqs. S7, e.g., by Laplace transform, subject to the initial condition  $[P_b](0) = 1$  and  $[P_{ns}](0) = 0$ , and carrying out the integral of Eq. S9, we obtain Eq. S6c.

We now derive the bimolecular rate constant  $k_a$  from the two-state model. For the moment let the volume of the bulk solution around the DNA to be  $V$ ; shortly we will take the limit  $V \rightarrow \infty$ . The ratio  $\kappa_3/\kappa_{3-}$  is the equilibrium constant between  $P_b$  and  $P_{ns}$ . Assuming that the potential of mean force  $U(\mathbf{r})$  is nonzero only when the protein is in the  $P_{ns}$  state, we have

$$\frac{\kappa_3}{\kappa_{3-}} = \frac{\int_{\text{surface region}} dv e^{-\beta U(\mathbf{r})}}{\int_{\text{bulk solution}} dv} = \frac{\mathcal{H}_{ns}}{V}, \quad [\text{S10}]$$

where  $dv$  is a volume element, and

$$\mathcal{H}_{\text{ns}} = \int_{\text{surface region}} dve^{-\beta U(\mathbf{r})} \quad [\text{S11}]$$

is the equilibrium constant for forming the protein-DNA nonspecific complex:

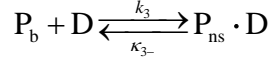

as  $V \rightarrow \infty$ . That is,

$$\mathcal{H}_{\text{ns}} = \frac{k_3}{\kappa_{3-}}. \quad [\text{S12}]$$

Comparing Eqs. S10 and S12, we obtain

$$\kappa_3 = k_3 \frac{1}{V}, \quad [\text{S13}]$$

in which  $1/V$  is effectively the DNA concentration (or protein concentration, since there is one molecule of each species in the same volume). Using Eqs. S10 and S13 in Eq. S6c, we have

$$t_s = \frac{V}{k_3} + \left(1 + \frac{V}{\mathcal{H}_{\text{ns}}}\right) \frac{1}{\kappa_1}. \quad [\text{S14}]$$

In analogy to Eq. S13 we may define the bimolecular rate constant  $k_a$  via

$$\frac{1}{t_s} = k_a \frac{1}{V}. \quad [\text{S15}]$$

Hence

$$\frac{V}{k_a} = \frac{V}{k_3} + \left(1 + \frac{V}{\mathcal{H}_{\text{ns}}}\right) \frac{1}{\kappa_1}. \quad [\text{S16a}]$$

Taking the  $V \rightarrow \infty$  limit, we find

$$\frac{1}{k_a} = \frac{1}{k_3} + \frac{1}{\mathcal{H}_{\text{ns}} \kappa_1}. \quad [\text{S16b}]$$

Using Eqs. S3 and S12, we can rewrite the last result as

$$k_a = k_3 \eta. \quad [\text{S17}]$$

**Reduction Factor  $\alpha$  for a Finite-Length DNA.** For the system of Fig. 1A, the reduction factor  $\alpha$  is determined by the following implicit relations (2):

$$\alpha = 1 - \int_0^{\infty} d\xi \frac{g(\xi) \sin \xi_1 / \xi_1}{\xi K_1(\xi) / K_0(\xi) + \xi^2 \Gamma}, \quad [\text{S18a}]$$

$$g(\xi) = (2\Gamma / \pi) \xi \left[ q(L) \sin(\xi L / R) + (\xi / R) \int_L^{\infty} dx \cos(\xi x / R) q(x) \right], \quad [\text{S18b}]$$

$$q(x) = \alpha q^\infty(x) + \int_0^{\infty} d\xi \frac{g(\xi) \cos(\xi x / R)}{\xi K_1(\xi) / K_0(\xi) + \xi^2 \Gamma}, \quad [\text{S18c}]$$

where  $\xi_1 = \xi h / R$  and

$$q^\infty(x) = \frac{k_a^\infty}{2\pi^2 DR} \int_0^{\infty} d\xi \frac{\cos(\xi x / R) \sin \xi_1 / \xi_1}{\xi K_1(\xi) / K_0(\xi) + \xi^2 \Gamma}. \quad [\text{S19}]$$

**Derivation of Eq. 11a.** The probability  $\eta(\mathbf{r})$  that the protein started at  $\mathbf{r}$  will reach the specific site instead of escape to infinity satisfies the backward Smoluchowski equation

$$e^{\beta U(\mathbf{r})} \nabla \cdot \mathcal{D}(\mathbf{r}) \cdot e^{-\beta U(\mathbf{r})} \nabla \eta(\mathbf{r}) = 0 \quad [\text{S20}]$$

with the outer boundary condition

$$\eta(\mathbf{r}) = 0, \quad r = \infty. \quad [\text{S21}]$$

By comparing the equations and boundary conditions satisfied by  $\eta(\mathbf{r})$  and the pair distribution function  $P(\mathbf{r})$ , it can be verified that

$$\eta(\mathbf{r}) = 1 - e^{-\beta U(\mathbf{r})} P(\mathbf{r}). \quad [\text{S22}]$$

In terms of  $\eta(\mathbf{r})$ , the rate constant  $k_a$  can be written as

$$k_a = - \oint_{r=\infty} d\mathbf{s} \cdot \mathcal{D}(\mathbf{r}) \cdot \nabla \eta(\mathbf{r}). \quad [\text{S23}]$$

Let  $P_3(\mathbf{r})$  be the pair distribution function for the problem in which the whole DNA exterior surface is absorbing. It satisfies the Smoluchowski equation

$$\nabla \cdot \mathbf{J}_3(\mathbf{r}) = 0, \quad [\text{S24a}]$$

$$\mathbf{J}_3(\mathbf{r}) = -\mathcal{D}(\mathbf{r}) \cdot e^{-\beta U(\mathbf{r})} \nabla e^{\beta U(\mathbf{r})} P_3(\mathbf{r}) \quad [\text{S24b}]$$

with the inner boundary condition

$$P_3(\mathbf{r}) = 0, \quad \mathbf{r} \in \text{DNA exterior surface}, \quad [\text{S25a}]$$

and the outer boundary condition

$$P_3(\mathbf{r}) = 1, \quad r = \infty. \quad [\text{S25b}]$$

Using Eqs. S20 and S24, it can be easily shown that

$$\nabla \cdot [\mathcal{D}(\mathbf{r}) \cdot P_3(\mathbf{r}) \nabla \eta(\mathbf{r}) + \mathbf{J}_3(\mathbf{r}) \eta(\mathbf{r})] = 0. \quad [\text{S26}]$$

Consequently

$$\begin{aligned} & - \oint_{r=\infty} d\mathbf{s} \cdot [\mathcal{D}(\mathbf{r}) \cdot P_3(\mathbf{r}) \nabla \eta(\mathbf{r}) + \mathbf{J}_3(\mathbf{r}) \eta(\mathbf{r})] \\ = & - \oint_{\text{any DNA-enclosing surface}} d\mathbf{s} \cdot [\mathcal{D}(\mathbf{r}) \cdot P_3(\mathbf{r}) \nabla \eta(\mathbf{r}) + \mathbf{J}_3(\mathbf{r}) \eta(\mathbf{r})]. \end{aligned}$$

Using the boundary conditions of Eqs. S21 and S25b, the left-hand side becomes

$$- \oint_{r=\infty} d\mathbf{s} \cdot \mathcal{D}(\mathbf{r}) \cdot \nabla \eta(\mathbf{r}),$$

which according to Eq. S23 is just  $k_a$ . For the right-hand side, we specialize the DNA-enclosing surface to the DNA exterior surface and use the boundary condition of Eq. S25a.

We thus derive

$$k_a = - \oint_{\text{DNA exterior surface}} d\mathbf{s} \cdot \mathbf{J}_3(\mathbf{r}) \eta(\mathbf{r}), \quad [\text{S27}]$$

which is Eq. 11a of the main text. A special case of Eq. S27 has been derived previously (3), where  $P_3(\mathbf{r})$  satisfies the absorbing boundary condition on a spherical surface,  $U(\mathbf{r})$  is spherically symmetric outside this surface, and the diffusion tensor is reduced to a scalar.

**Derivation of  $\bar{\eta}$  for an  $x$ -Dependent Surface Potential.** Here we consider a protein, with a fixed conformation, that experiences an  $x$ -dependent surface potential. Specifically, we consider a surface potential with a step-function form:

$$U(x) = U_0 \quad \text{when } |x| < h;$$

$$= U \quad \text{when } h < |x| < L. \quad [\text{S28}]$$

Correspondingly the values of  $\kappa_3(x)$  in the two intervals will be denoted as  $\kappa_{03-}$  and  $\kappa_{3-}$ , respectively. Because of the symmetry of the problem about  $x = 0$ , we now restrict to the domain  $0 < x < L$ . The capture probability,  $\eta(x)$ , for the nonspecifically bound protein starting at position  $x$  is governed by

$$D \frac{d^2 \eta(x)}{dx^2} - \kappa_{03-} \eta(x) = 0, \quad \text{when } 0 < x < h; \quad [\text{S29a}]$$

$$D \frac{d^2 \eta(x)}{dx^2} - \kappa_{3-} \eta(x) = 0, \quad \text{when } h < x < L. \quad [\text{S29b}]$$

The solution has the form

$$\eta(x) = A_1 e^{x/m_0} + A_2 e^{-x/m_0}, \quad \text{when } 0 < x < h; \quad [\text{S30a}]$$

$$= B_1 e^{x/m} + B_2 e^{-x/m}, \quad \text{when } h < x < L. \quad [\text{S30b}]$$

where  $m_0 = (D/\kappa_{03-})^{1/2}$ ,  $m = (D/\kappa_{3-})^{1/2}$ , and  $A_1, A_2, B_1$ , and  $B_2$  are coefficients to be determined.

The boundary conditions are

$$\eta(0) = 1, \quad [\text{S31a}]$$

$$\left. \frac{d\eta(x)}{dx} \right|_{x=L} = 0. \quad [\text{S31b}]$$

In addition,  $\eta(x)$  and its derivative satisfy the following continuity conditions at  $x = h$ :

$$\eta(h^-) = \eta(h^+), \quad [\text{S32a}]$$

$$e^{-\beta U(x)} \left. \frac{d\eta(x)}{dx} \right|_{x=h^-} = e^{-\beta U(x)} \left. \frac{d\eta(x)}{dx} \right|_{x=h^+}. \quad [\text{S32b}]$$

Using these conditions, we find

$$A_1 = \frac{e^{-2h/m_0}}{1 - e^{-2h/m_0}} \frac{e^{-\beta \Delta U} m / m_0 - \tanh(L_1 / m)}{G}, \quad [\text{S33a}]$$

$$A_2 = \frac{1}{1 - e^{-2h/m_0}} \frac{e^{-\beta \Delta U} m / m_0 + \tanh(L_1 / m)}{G}, \quad [\text{S33b}]$$

$$B_1 = \frac{e^{-(2L-h)/m}}{(1 + e^{-2L_1/m}) \sinh(h / m_0)} \frac{e^{-\beta \Delta U} m / m_0}{G}, \quad [\text{S33c}]$$

$$B_2 = \frac{e^{h/m}}{(1 + e^{-2L_1/m}) \sinh(h/m_0)} \frac{e^{-\beta\Delta U} m_0 / m_0}{G}, \quad [\text{S33d}]$$

where  $\Delta U = U_0 - U$ ,  $L_1 = L - h$ , and

$$G = e^{-\beta\Delta U} (m/m_0) \coth(h/m_0) + \tanh(L_1/m). \quad [\text{S34}]$$

The average capture probability of the nonspecifically bound protein is

$$\begin{aligned} \bar{\eta} &= (1/L) \int_0^L dx \eta(x) \\ &= \frac{e^{-\beta\Delta U} (m/m_0) [1 + (m/m_0) \tanh(L_1/m) / \sinh(h/m_0)]}{GL/m_0} \\ &\quad + \frac{\tanh(h/2m_0) \tanh(L_1/m)}{GL/m_0}. \end{aligned} \quad [\text{S35}]$$

This reduces to Eq. 15 of the main text when  $\Delta U = 0$  and  $\kappa_{03-} = \kappa_{3-}$ .

If the local energy well at the specific site is infinitely deep (i.e.,  $\beta\Delta U \rightarrow -\infty$ ), which is the case for the system of Fig. 1A, then  $m_0 \rightarrow \infty$  and Eq. S35 becomes

$$\bar{\eta} = \frac{h}{L} + \frac{\tanh(L_1/m)}{L/m}. \quad [\text{S36}]$$

In this limiting situation, the whole interval  $|x| < h$  is effectively absorbing, so there  $\eta(x) = 1$ ; in  $h < x < L$   $\eta(x)$  can be determined by solving Eq. S29b with the boundary condition  $\eta(h) = 1$ . Averaging over the two intervals of  $|x|$  results in Eq. S36. The solid curves in Figs. 2A and 2B display  $k_a$  obtained by combining Eq. S36 with Eqs. 6 and 11b of the main text.

**Capture Probability for a Protein with Conformational Switch.** When the nonspecifically bound protein can switch between two conformations, the capture probability,  $\eta_g(x)$ , starting at position  $x$  and conformation  $g = a$  or  $i$  is governed by Eqs. 18 of the main text. We first note that the detailed balance condition given by Eq. 17 of the main text constraints the relation between  $\omega_g(x)$  and  $\kappa_{g-}(x)$ . According to Eq. 19 of the main text,

$$\frac{\kappa_i(x)}{\kappa_a(x)} = e^{-\beta[U_a(x) - U_i(x)]}. \quad [\text{S37a}]$$



Using this result in Eq. **17** of the main text, we get

$$\frac{\omega_i(x)/\omega_a(x)}{\kappa_i(x)/\kappa_a(x)} = \frac{p_{3a}}{p_{3i}}. \quad [\text{S37b}]$$

Therefore the ratio of  $\omega_i(x)/\omega_a(x)$  to  $\kappa_i(x)/\kappa_a(x)$  must be  $x$ -independent.

If  $U_g(x)$ ,  $\omega_g(x)$ , and  $\kappa_g(x)$  are all  $x$ -independent, then Eqs. **18** become

$$D_a \frac{d^2 \eta_a(x)}{dx^2} - \omega_a \eta_a(x) + \omega_a \eta_i(x) - \kappa_{a-} \eta_a(x) = 0, \quad [\text{S38a}]$$

$$D_i \frac{d^2 \eta_i(x)}{dx^2} + \omega_i \eta_a(x) - \omega_i \eta_i(x) - \kappa_{i-} \eta_i(x) = 0. \quad [\text{S38b}]$$

The solution has the form

$$\eta_a(x) = A_1 e^{\lambda_+^{1/2} x} + A_2 e^{-\lambda_+^{1/2} x} + B_1 e^{\lambda_-^{1/2} x} + B_2 e^{-\lambda_-^{1/2} x}, \quad [\text{S39a}]$$

$$\eta_i(x) = -F_+(A_1 e^{\lambda_+^{1/2} x} + A_2 e^{-\lambda_+^{1/2} x}) - F_-(B_1 e^{\lambda_-^{1/2} x} + B_2 e^{-\lambda_-^{1/2} x}), \quad [\text{S39b}]$$

where  $A_1$ ,  $A_2$ ,  $B_1$ , and  $B_2$  are coefficients to be determined, and

$$\lambda_{\pm} = \frac{D_a(\omega_i + \kappa_{i-}) + D_i(\omega_a + \kappa_{a-}) \pm \{[D_a(\omega_i + \kappa_{i-}) - D_i(\omega_a + \kappa_{a-})]^2 + 4D_a D_i \omega_a \omega_i\}^{1/2}}{2D_a D_i}, \quad [\text{S40a}]$$

$$F_{\pm} = \frac{D_a \lambda_{\pm} - (\omega_a + \kappa_{a-})}{\omega_a}. \quad [\text{S40b}]$$

The boundary conditions of  $\eta_g(x)$  are

$$\eta_a(0) = 1; \quad \left. \frac{d\eta_i(x)}{dx} \right|_{x=0} = 0; \quad [\text{S41a}]$$

$$\left. \frac{d\eta_a(x)}{dx} \right|_{x=L} = 0; \quad \left. \frac{d\eta_i(x)}{dx} \right|_{x=L} = 0. \quad [\text{S41b}]$$

Using these we find

$$A_1 = \frac{e^{-2\lambda_+^{1/2} L}}{1 - e^{-2\lambda_+^{1/2} L}} \frac{1}{\coth(\lambda_+^{1/2} L) + F \coth(\lambda_-^{1/2} L)}, \quad [\text{S42a}]$$

$$A_2 = \frac{1}{1 - e^{-2\lambda_+^{1/2} L}} \frac{1}{\coth(\lambda_+^{1/2} L) + F \coth(\lambda_-^{1/2} L)}, \quad [\text{S42b}]$$

$$B_1 = F \frac{e^{-2\lambda_-^{1/2} L}}{1 - e^{-2\lambda_-^{1/2} L}} \frac{1}{\coth(\lambda_+^{1/2} L) + F \coth(\lambda_-^{1/2} L)}, \quad [\text{S42c}]$$

$$B_2 = F \frac{1}{1 - e^{-2\lambda_-^{1/2}L}} \frac{1}{\coth(\lambda_+^{1/2}L) + F \coth(\lambda_-^{1/2}L)}, \quad [\text{S42d}]$$

where

$$F = -\frac{\lambda_+^{1/2}F_+}{\lambda_-^{1/2}F_-}. \quad [\text{S43}]$$

The average capture probability of the nonspecifically bound protein is

$$\begin{aligned} \bar{\eta} &= (p_{3a}/L) \int_0^L dx \eta_a(x) + (p_{3i}/L) \int_0^L dx \eta_i(x) \\ &= \frac{[p_{3a} + p_{3i} \omega_i / (\omega_i + \kappa_{i-})] (1/\lambda_+^{1/2}L + F/\lambda_-^{1/2}L)}{\coth(\lambda_+^{1/2}L) + F \coth(\lambda_-^{1/2}L)}. \end{aligned} \quad [\text{S44}]$$

The dashed curve in Fig. 3 displays  $k_a$  obtained by combining Eq. S44 with Eqs. 6 and 11b of the main text.

We now consider two opposite limits of Eq. S44. When  $\omega_g \rightarrow 0$ , we find

$$\begin{aligned} \lambda_+ &\rightarrow \frac{\kappa_{a-}}{D_a} \equiv m_a^{-2}, \\ \lambda_- &\rightarrow \frac{\kappa_{i-}}{D_i} \equiv m_i^{-2}, \end{aligned}$$

$$F \rightarrow 0,$$

and consequently the slow conformational-transition limit of  $\bar{\eta}$  is

$$\bar{\eta}_s \equiv \lim_{\omega_g \rightarrow 0} \bar{\eta} = p_{3a} \frac{\tanh(L/m_a)}{L/m_a}. \quad [\text{S45}]$$

In the limit  $\omega_g \rightarrow \infty$  we find

$$\begin{aligned} \lambda_+ &\rightarrow \infty, \\ \lambda_- &\rightarrow \frac{\omega_i \kappa_{a-} + \omega_a \kappa_{i-}}{\omega_i D_a + \omega_a D_i} \equiv \bar{m}^{-2}, \end{aligned}$$

$$F \rightarrow \infty,$$

and therefore the fast conformational-transition limit of  $\bar{\eta}$  is

$$\bar{\eta}_f \equiv \lim_{\omega_g \rightarrow \infty} \bar{\eta} = \frac{\tanh(L/\bar{m})}{L/\bar{m}}. \quad [\text{S46}]$$

For the potentials shown in Fig. 1B,  $U_i$  is  $x$ -independent but  $U_a$  has the step-function form of Eq. S28. The  $U_a$  well spans the specific site. We will add a “0” in the subscript to denote parameters within the specific site. For example,  $\kappa_{0g^-}$  denotes the rate constant for the protein in conformation  $g$  to escape to the bulk solution from the specific site whereas  $\kappa_{g^-}$  denotes the counterpart when the protein is elsewhere on the DNA surface. Due to symmetry we will only consider  $0 < x < L$ .

We are particularly interested in the case where the  $U_a$  well at the specific site is infinitely deep. Then  $\kappa_{0a^-} \rightarrow 0$  (see Eq. S37a) and  $\omega_{0a} \rightarrow 0$  (see Eq. 17 of the main text). In addition, the continuity condition on  $d\eta_a/dx$  at  $x = h$  (see Eq. S32b) means that  $d\eta_a/dx = 0$  at  $x = h^-$ . Solving Eq. S38a under these conditions and  $\eta_a(0) = 1$  leads to

$$\eta_a(x) = 1 \quad \text{for } 0 < x < h. \quad [\text{S47a}]$$

The interactions that produce the  $U_a$  well at the specific site will also affect the inactive-to-active transition rate  $\omega_{0i}$ . Here we consider the extreme case  $\omega_{0i} \rightarrow \infty$ . Then we must have (see Eq. S32a)

$$\eta_i(x) = \eta_a(x) = 1 \quad \text{for } 0 < x < h. \quad [\text{S47b}]$$

We can then solve  $\eta_g(x)$  in  $h < x < L$  using the boundary conditions  $\eta_g(h) = 1$  as demanded by Eqs. S47. The solution has the form of Eqs. S39, but with the coefficients now given by

$$A_1 = \frac{e^{-\lambda_+^{1/2}(2L-h)} (1 + F_-)}{1 + e^{-2\lambda_+^{1/2}L_1} (F_- - F_+)}, \quad [\text{S48a}]$$

$$A_2 = \frac{e^{\lambda_+^{1/2}h} (1 + F_-)}{1 + e^{-2\lambda_+^{1/2}L_1} (F_- - F_+)}, \quad [\text{S48b}]$$

$$B_1 = -\frac{e^{-\lambda_-^{1/2}(2L-h)} (1 + F_+)}{1 + e^{-2\lambda_-^{1/2}L_1} (F_- - F_+)}, \quad [\text{S48c}]$$

$$B_2 = -\frac{e^{\lambda_-^{1/2}h} (1 + F_+)}{1 + e^{-2\lambda_-^{1/2}L_1} (F_- - F_+)}. \quad [\text{S48d}]$$

Averaging over initial position and initial conformation leads to

$$\bar{\eta} = \frac{h}{L} + (p_{3a} - p_{3i}F_+) \frac{\tanh(\lambda_+^{1/2}L_1)}{\lambda_+^{1/2}L} \frac{1+F_-}{F_- - F_+} + (-p_{3a} + p_{3i}F_-) \frac{\tanh(\lambda_-^{1/2}L_1)}{\lambda_-^{1/2}L} \frac{1+F_+}{F_- - F_+}. \quad [\text{S49}]$$

The solid curve in Fig. 3 displays  $k_a$  obtained by combining Eq. S49 with Eqs. 6 and 11b of the main text.

The slow transition limit of  $\bar{\eta}$  is now

$$\bar{\eta}_s = \frac{h}{L} + p_{3a} \frac{\tanh(L_1/m_a)}{L/m_a} + p_{3i} \frac{\tanh(L_1/m_i)}{L/m_i}, \quad [\text{S50a}]$$

where  $m_g = (D_g/\kappa_{g-})^{1/2}$ . The fast transition limit is

$$\bar{\eta}_f = \frac{h}{L} + \frac{\tanh(L_1/\bar{m})}{L/\bar{m}}. \quad [\text{S50b}]$$

**MFPT of a Nonspecifically Bound Protein.** The mean-first-passage-time (MFPT),  $\tau(x)$ , for a protein with a fixed conformation starting at position  $x$  is governed by (4)

$$e^{\beta U(x)} \frac{d}{dx} D e^{-\beta U(x)} \frac{d\tau(x)}{dx} = -1. \quad [\text{S51}]$$

Applying the absorbing boundary condition at  $x = 0$  and the reflecting boundary condition at  $x = L$ , one finds

$$D\tau(x) = \int_0^x dx_1 e^{\beta U(x_1)} \int_{x_1}^L dx_2 e^{-\beta U(x_2)}. \quad [\text{S52a}]$$

For an  $x$ -independent potential, the result is

$$D\tau(x) = [L^2 - (L-x)^2]/2. \quad [\text{S52b}]$$

For the step-function potential of Eq. S28, we find

$$\begin{aligned} D\tau(x) &= [h^2 - (h-x)^2]/2 + e^{\beta\Delta U} L_1 x && \text{when } 0 < x < h; \\ &= h^2/2 + e^{\beta\Delta U} L_1 h + [L_1^2 - (L-x)^2]/2 && \text{when } h < x < L. \end{aligned} \quad [\text{S52c}]$$

We are particularly interested in the case shown in Fig. 1A, where the energy well at the specific site is infinitely deep (i.e.,  $\beta\Delta U \rightarrow -\infty$ ).

What enters the two-state model (see Eq. 10a of the main text) is the MFPT averaged over initial position. For an  $x$ -independent potential, the result is  $\bar{\tau} = L^2/3D$  (4). However,

when the potential is  $x$ -dependent, there is a question of whether the average should be weighted by the Boltzmann factor  $\exp[-\beta U(x)]$ . The usual use of MFPT has the Boltzmann weight (4). The Boltzmann-weight average for the step-function potential is  $h^2/3D$  when  $\beta\Delta U \rightarrow -\infty$ . That would predict a strong dependence of  $k_a$  on  $h$ , which contradicts the weak  $h$  dependence of the exact result given by Eq. 4 of the main text (see Fig. S2). However, the unweighted average,

$$\bar{\tau} = \frac{h^3 + 3h^2L_1/2 + L_1^3}{3DL}, \quad [\text{S53}]$$

seems appropriate for use in the two-state model. Recall that the average of  $\eta(x)$  over initial position is also unweighted. When  $h \rightarrow 0$ , this  $\bar{\tau}$  properly reduces to  $L^2/3D$ , the result obtained when the potential is constant. The dashed curves in Figs. 2A and 2B display  $k_a$  obtained by combining Eq. S53 with Eqs. 6, 9, and 10a of the main text.

Next we consider the case where the nonspecifically bound protein can switch between two conformations. The MFPT  $\tau_g(x)$  for the protein starting at position  $x$  and conformation  $g = a$  or  $i$  is governed by

$$e^{\beta U_a(x)} \frac{d}{dx} D_a e^{-\beta U_a(x)} \frac{d\tau_a(x)}{dx} - \omega_a(x)\tau_a(x) + \omega_a(x)\tau_i(x) = -1, \quad [\text{S54a}]$$

$$e^{\beta U_i(x)} \frac{d}{dx} D_i e^{-\beta U_i(x)} \frac{d\tau_i(x)}{dx} + \omega_i(x)\tau_a(x) - \omega_i(x)\tau_i(x) = -1. \quad [\text{S54b}]$$

We focus on the case where  $U_g(x)$  and  $\omega_g(x)$  are  $x$ -independent. Hu et al. (5) has studied a similar problem. The two equations for  $\tau_g(x)$  can be uncoupled by forming appropriate linear combinations. We find

$$\frac{d^2[p_a D_a \tau_a(x) + p_i D_i \tau_i(x)]}{dx^2} = -1, \quad [\text{S55a}]$$

$$D_a D_i \frac{d^2[\tau_a(x) - \tau_i(x)]}{dx^2} - \omega \bar{D}[\tau_a(x) - \tau_i(x)] = -\Delta D, \quad [\text{S55b}]$$

where

$$\omega = \omega_a + \omega_i, \quad [\text{S56a}]$$

$$p_a = \omega_1 / \omega, \quad p_i = \omega_a / \omega, \quad [\text{S56b}]$$

$$\Delta D = D_i - D_a, \quad [\text{S56c}]$$

$$\bar{D} = p_a D_a + p_i D_i. \quad [\text{S56d}]$$

The solution of Eq. S55a has the form

$$p_a D_a \tau_a(x) + p_i D_i \tau_i(x) = A_1 + A_2 x - x^2 / 2, \quad [\text{S57a}]$$

where  $A_1$  and  $A_2$  are coefficients to be determined. The solution of Eq. S55b has the form

$$\tau_a(x) - \tau_i(x) = \Delta D / \omega \bar{D} + B_1 e^{(\omega \bar{D} / D_a D_i)^{1/2} x} + B_2 e^{-(\omega \bar{D} / D_a D_i)^{1/2} x}, \quad [\text{S57b}]$$

where  $B_1$  and  $B_2$  are to be determined.

To determine  $A_1$ ,  $A_2$ ,  $B_1$ , and  $B_2$ , we apply the boundary conditions at  $x = 0$  and  $x = L$ .

These are

$$\tau_a(0) = 0; \quad \left. \frac{d\tau_i(x)}{dx} \right|_{x=0} = 0; \quad [\text{S58a}]$$

$$\left. \frac{d\tau_a(x)}{dx} \right|_{x=L} = 0; \quad \left. \frac{d\tau_i(x)}{dx} \right|_{x=L} = 0. \quad [\text{S58b}]$$

The results are

$$A_1 = -\frac{p_i D_i \Delta D}{\omega \bar{D}} + \frac{p_i D_i L \coth[(\omega \bar{D} / D_a D_i)^{1/2} L]}{p_a D_a (\omega \bar{D} / D_a D_i)^{1/2}}, \quad [\text{S59a}]$$

$$A_2 = L, \quad [\text{S59b}]$$

$$B_1 = -\frac{L e^{-2(\omega \bar{D} / D_a D_i)^{1/2} L}}{p_a D_a (\omega \bar{D} / D_a D_i)^{1/2} [1 - e^{-2(\omega \bar{D} / D_a D_i)^{1/2} L}]}, \quad [\text{S59c}]$$

$$B_2 = -\frac{L}{p_a D_a (\omega \bar{D} / D_a D_i)^{1/2} [1 - e^{-2(\omega \bar{D} / D_a D_i)^{1/2} L}]}. \quad [\text{S59d}]$$

We then want to average  $\tau_g(x)$  over initial position and initial conformation. There is uncertainty regarding the weighting factor for averaging over initial conformation. A natural choice is to use  $p_g$  as the weighting factor, resulting in

$$\bar{\tau} = (p_a / L) \int_0^L dx \tau_a(x) + (p_i / L) \int_0^L dx \tau_i(x)$$

$$= \frac{L^2}{3\bar{D}} + \frac{p_i D_i L}{p_a D_a \bar{D} (\omega \bar{D} / D_a D_i)^{1/2}} \left\{ \frac{1}{\tanh[(\omega \bar{D} / D_a D_i)^{1/2} L]} - \frac{1}{(\omega \bar{D} / D_a D_i)^{1/2} L} \right\} + \frac{p_i}{\omega_i}. \quad [60]$$

It has the following limiting values:

$$\bar{\tau} \rightarrow \frac{L^2}{3\bar{D}} \quad \text{as } \omega_g \rightarrow \infty; \quad [S61a]$$

$$\bar{\tau} \rightarrow \frac{L^2}{3p_a D_a} + \frac{p_i}{\omega_i} \quad \text{as } \omega_g \rightarrow 0. \quad [S61b]$$

Note that  $\bar{\tau}$  goes to infinity in the latter limit, since when  $\omega_i = 0$  the protein started in the inactive conformation stays in that conformation and hence cannot be absorbed. The calculation of  $\bar{\eta}$  suggests a different weighting factor, i.e.,  $p_{3g}$  (see Eq. S46), although  $p_{3g}$  has so far not been introduced to an MFPT problem. Regardless of the weighting factor,  $\bar{\tau}$  would go to infinity in the slow transition limit.

It is unclear how this  $\bar{\tau}$  can be used to predict  $k_a$ . In the two-state model for the protein with a fixed conformation,  $\bar{\tau}$  along with the escape rate  $\kappa_{3-}$  is used in Eq. 10a of the main text to obtain the average capture probability. However, in the present case where the protein switches between two conformations, there are two distinct escape rates,  $\kappa_{a-}$  and  $\kappa_{i-}$ . Naively we may use a conformationally averaged escape rate,  $\bar{\kappa}_{3-} = p_a \kappa_{a-} + p_i \kappa_{i-}$ , in place of  $\kappa_{3-}$ . However, other than in the fast transition limit, it is unclear whether this use can be justified. In any event, the infinite value of  $\bar{\tau}$  in the slow transition limit would lead to a zero  $k_a$ , which cannot be unjustified. So the use of a two-state model to predict  $k_a$  for any DNA-binding protein that switches between two conformations is fraught with problems.

### **Rate Constant $k_3$ When Nonspecific Binding Is Restricted to a Narrow Angular Range.**

Here we consider the case where nonspecific binding is restricted to a narrow angular range. The position  $\mathbf{r}$  of the protein relative to the DNA can be specified by the coordinate  $x$  along, the distance  $\rho$  to, and the rotation angle  $\phi$  around the DNA axis. The steady-state Smoluchowski equation for the pair distribution function  $P(\mathbf{r})$  now takes the form

$$D_3 \left( \frac{\partial^2}{\partial x^2} + \frac{1}{\rho} \frac{\partial}{\partial \rho} \rho \frac{\partial}{\partial \rho} + \frac{1}{\rho^2} \frac{\partial^2}{\partial \phi^2} \right) P(\mathbf{r}) = 0. \quad [\text{S62}]$$

The nonspecific binding site is specified by  $|x| < L$ ,  $|\phi| < \phi_0$ , and  $\rho = R$ , where  $2\phi_0$  is the angular range of the binding site. For convenience we will denote a point on this binding site as  $\mathbf{r} \in \Xi$ . The inner boundary condition is

$$P(\mathbf{r}) = 0, \quad \text{when } \mathbf{r} \in \Xi; \quad [\text{S63a}]$$

$$D_3 \frac{\partial P(\mathbf{r})}{\partial \rho} = 0, \quad \text{elsewhere on } \rho = R. \quad [\text{S63b}]$$

Even though the DNA has a finite length  $2L$ , following Berg and Ehrenberg (6) we have treated the surface  $\rho = R$  beyond the DNA as reflecting.

It is clear that  $P(\mathbf{r})$  is an even function of both  $x$  and  $\phi$ . We can express  $P(\mathbf{r})$  in the following expansion:

$$P(\mathbf{r}) = 1 - \int_0^\infty d\zeta \sum_{j=0}^\infty A_j(\zeta) \cos(\zeta z) \cos(j\phi) K_j(\zeta \rho), \quad [\text{S64}]$$

where  $K_j(x)$  are modified Bessel functions. The coefficients  $A_j(\zeta)$  are determined by the boundary condition of Eqs. S63. This mixed-type of boundary condition presents significant difficulty. We thus replace Eq. S63a by the constant-flux approximation (7),

$$D_3 \frac{\partial P(\mathbf{r})}{\partial \rho} = Q, \quad \text{when } \mathbf{r} \in \Xi, \quad [\text{S63c}]$$

and determine the constant  $Q$  by requiring that the absorbing boundary condition of Eq. S63a is satisfied on the average:

$$\langle P(\mathbf{r}) \rangle \equiv \int_{\mathbf{r} \in \Xi} ds P(\mathbf{r}) / \int_{\mathbf{r} \in \Xi} ds = 0. \quad [\text{S63d}]$$

Now the flux at  $\rho = R$  has value  $Q$  when  $\mathbf{r} \in \Xi$  and 0 otherwise. This function has the following expansion:

$$D_3 \frac{\partial P(\mathbf{r})}{\partial \rho} \Big|_{\rho=R} = \frac{4Q}{\pi^2} \left[ \frac{\phi_0}{2} + \sum_{j=1}^\infty \frac{\sin(j\phi_0) \cos(j\phi)}{j} \right] \int_0^\infty d\zeta \frac{\sin(\zeta L) \cos(\zeta z)}{\zeta}. \quad [\text{S65}]$$

Using Eq. S64 to evaluate the flux and comparing against Eq. S65, we find



$$-D_3 A_j(\zeta) \zeta K_j'(\zeta R) = \frac{4Q \phi_0 \sin(\zeta L)}{\pi^2 2 \zeta} \quad \text{when } j = 0; \quad [\text{S66a}]$$

$$= \frac{4Q \sin(j\phi_0) \sin(\zeta L)}{\pi^2 j \zeta} \quad \text{when } j > 0, \quad [\text{S66b}]$$

where we have used a prime to denote derivative. Using Eq. **S63d**, we obtain

$$Q = \frac{\pi^2 D_3 / 2\phi_0 L}{\int_0^\infty d\xi \frac{\sin^2 \xi_2}{\xi_2^2} \left[ \frac{1}{\xi K_1(\xi) / K_0(\xi)} + \sum_{j=1}^\infty \frac{2 \sin^2(j\phi_0) / (j\phi_0)^2}{\xi K_{j-1}(\xi) / K_j(\xi) + j} \right]}. \quad [\text{S67}]$$

where  $\xi = \zeta R$  and  $\xi_2 = \xi L/R$ . Finally the rate constant is

$$\begin{aligned} k_3 &= \int_{\mathbf{r} \in \Xi} da D_3 \frac{\partial P(\mathbf{r})}{\partial \rho} = 4\phi_0 R L Q \\ &= \frac{2\pi^2 D_3 R}{\int_0^\infty d\xi \frac{\sin^2 \xi_2}{\xi_2^2} \left[ \frac{1}{\xi K_1(\xi) / K_0(\xi)} + \sum_{j=1}^\infty \frac{2 \sin^2(j\phi_0) / (j\phi_0)^2}{\xi K_{j-1}(\xi) / K_j(\xi) + j} \right]}. \end{aligned} \quad [\text{S68}]$$

If the nonspecific binding site extends to the full angular range (i.e.,  $\phi_0 = \pi$ ), then all the  $j > 0$  terms disappear and Eq. **S68** reduces to Eq. **6** of the main text.

1. Kolomeisky AB (2011) Physics of protein-DNA interactions: mechanisms of facilitated target search. *Phys Chem Chem Phys* 13:2088-2095.
2. Zhou HX (2005) A model for the mediation of processivity of DNA-targeting proteins by nonspecific binding: dependence on DNA length and presence of obstacles. *Biophys J* 88:1608-1615.
3. Zhou HX (1990) On the Calculation of Diffusive Reaction-Rates Using Brownian Dynamics Simulations. *J Chem Phys* 92:3092-3095.
4. Szabo A, Schulten K, Schulten Z (1980) First passage time approach to diffusion controlled reactions. *J Chem Phys* 72:4350-4357.

5. Hu LH, Grosberg AY, Bruinsma R (2009) First passage time distribution for the 1D diffusion of particles with internal degrees of freedom. *J Phys A-Math Theor* 42:434011.
6. Berg OG, Ehrenberg M (1982) Association kinetics with coupled three- and one-dimensional diffusion. Chain-length dependence of the association rate of specific DNA sites. *Biophys Chem* 15:41-51.
7. Shoup D, Lipari G, Szabo A (1981) Diffusion-controlled bimolecular reaction rates. The effect of rotational diffusion and orientation constraints. *Biophys J* 36:697-714.

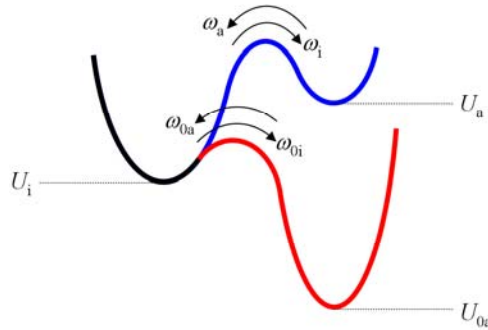

**Fig. S1** Conformational transition rates  $\omega_{0a}$  and  $\omega_{0i}$  at the cognate site and  $\omega_a$  and  $\omega_i$  elsewhere on the DNA surface. The potential energies  $U_a(x)$  and  $U_i(x)$  at position  $x$  along the DNA, shown in Fig. 1B, correspond to two energy minima in conformational space. The energy surface in conformational space at two  $x$  positions is shown here. The red trace shows the energy surface when  $x$  is at the cognate site, and the blue trace shows the energy surface when  $x$  is at a noncognate site. The energy minimum corresponding to the inactive conformation has the same value  $U_i$  at the two  $x$  positions, but the minimum corresponding to the active conformation has a value  $U_{0a}$  at the cognate site and  $U_a$  at the noncognate site.  $U_{0a}$  is much more negative than  $U_i$  but  $U_a$  is much more positive than  $U_i$ . Consequently  $\omega_{0a} \ll \omega_{0i}$  but  $\omega_a \gg \omega_i$ .

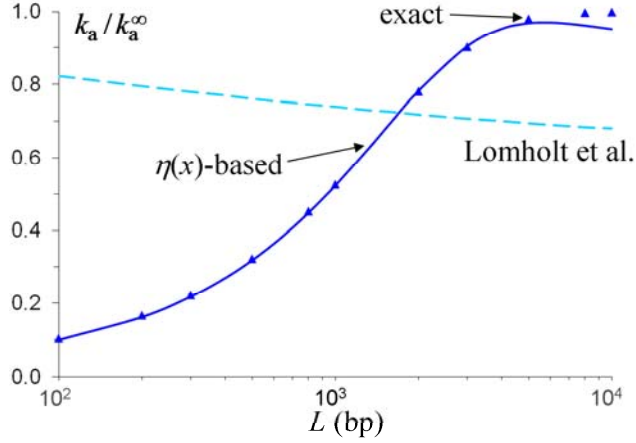

**Fig. S2** Comparison of the predicted  $k_a$  of Lomholt et al. against the exact solution for the system of Fig. 1A. Lomholt et al.'s  $k_a$  is

$$k_a = \frac{2\pi^2 D_3 R}{\int_0^\infty d\xi \frac{1}{\frac{\xi K_1(\xi)/K_0(\xi)}{1 + (4\pi D_3 L/k_3)\xi K_1(\xi)/K_0(\xi)} + \xi^2 \Gamma}}.$$

The dashed curve display this result at  $\Gamma = 10^4$ . The exact solution is shown as symbols. We also show the  $k_a$  predicted by the  $\eta(x)$ -based approach as the solid curve. To match the problem solved by Lomholt et al., we took the  $h \rightarrow 0$  limit in the exact and  $\eta(x)$ -based solutions. The latter solutions have very weak dependence on  $h$  and the  $h \rightarrow 0$  limits shown here are virtually identical to those shown in Fig. 2A for  $h = 3 \text{ \AA}$ . Note that the exact  $k_a$  increases with increasing DNA length  $L$  whereas Lomholt et al.'s  $k_a$  shows the opposite trend.
